# Supplementary material
Source: HighWire-hosted journal article supplement (http://www.cmaj.ca/highwire/filestream/72385/field_highwire_adjunct_files/0/181104-image-1-at.pdf)

**Appendix 1 (as supplied by the authors):** Histopathological examination revealed hyperkeratosis, papillomatosis, and marked acanthosis of the epidermis, which is consistent with the clinical presentation of tripe palm. *Inset:* biopsy site. Hematoxylin and eosin stain. (Original magnification x 100.)

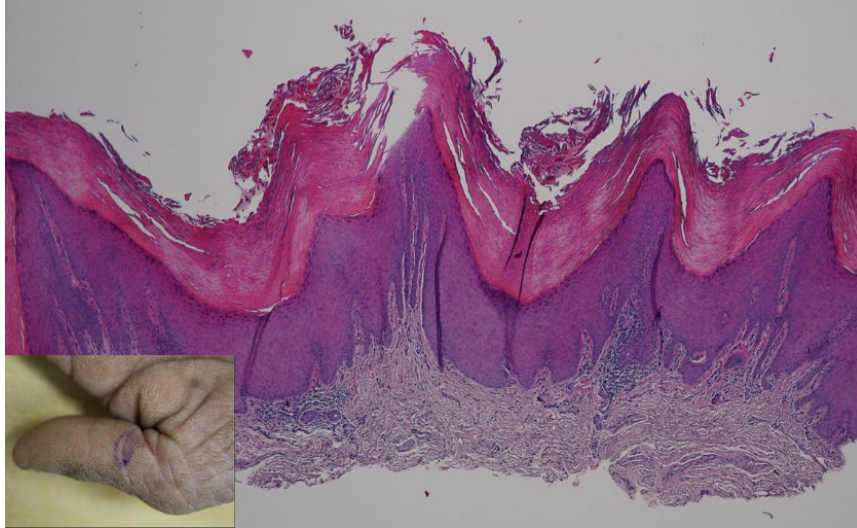

Supplement: 181104-image-1-at.pdf [file 181104-image-1-at.pdf]
